# Supplementary material for: Text-mining uncovers the unique dynamics of socio-economic impacts during multi-year drought
Source: Copernicus journal article supplement (doi:10.5194/nhess-2023-228), 2023-12-21
Supplement: Supplementary file [file nhess-2023-228-AC1-supplement.pdf]

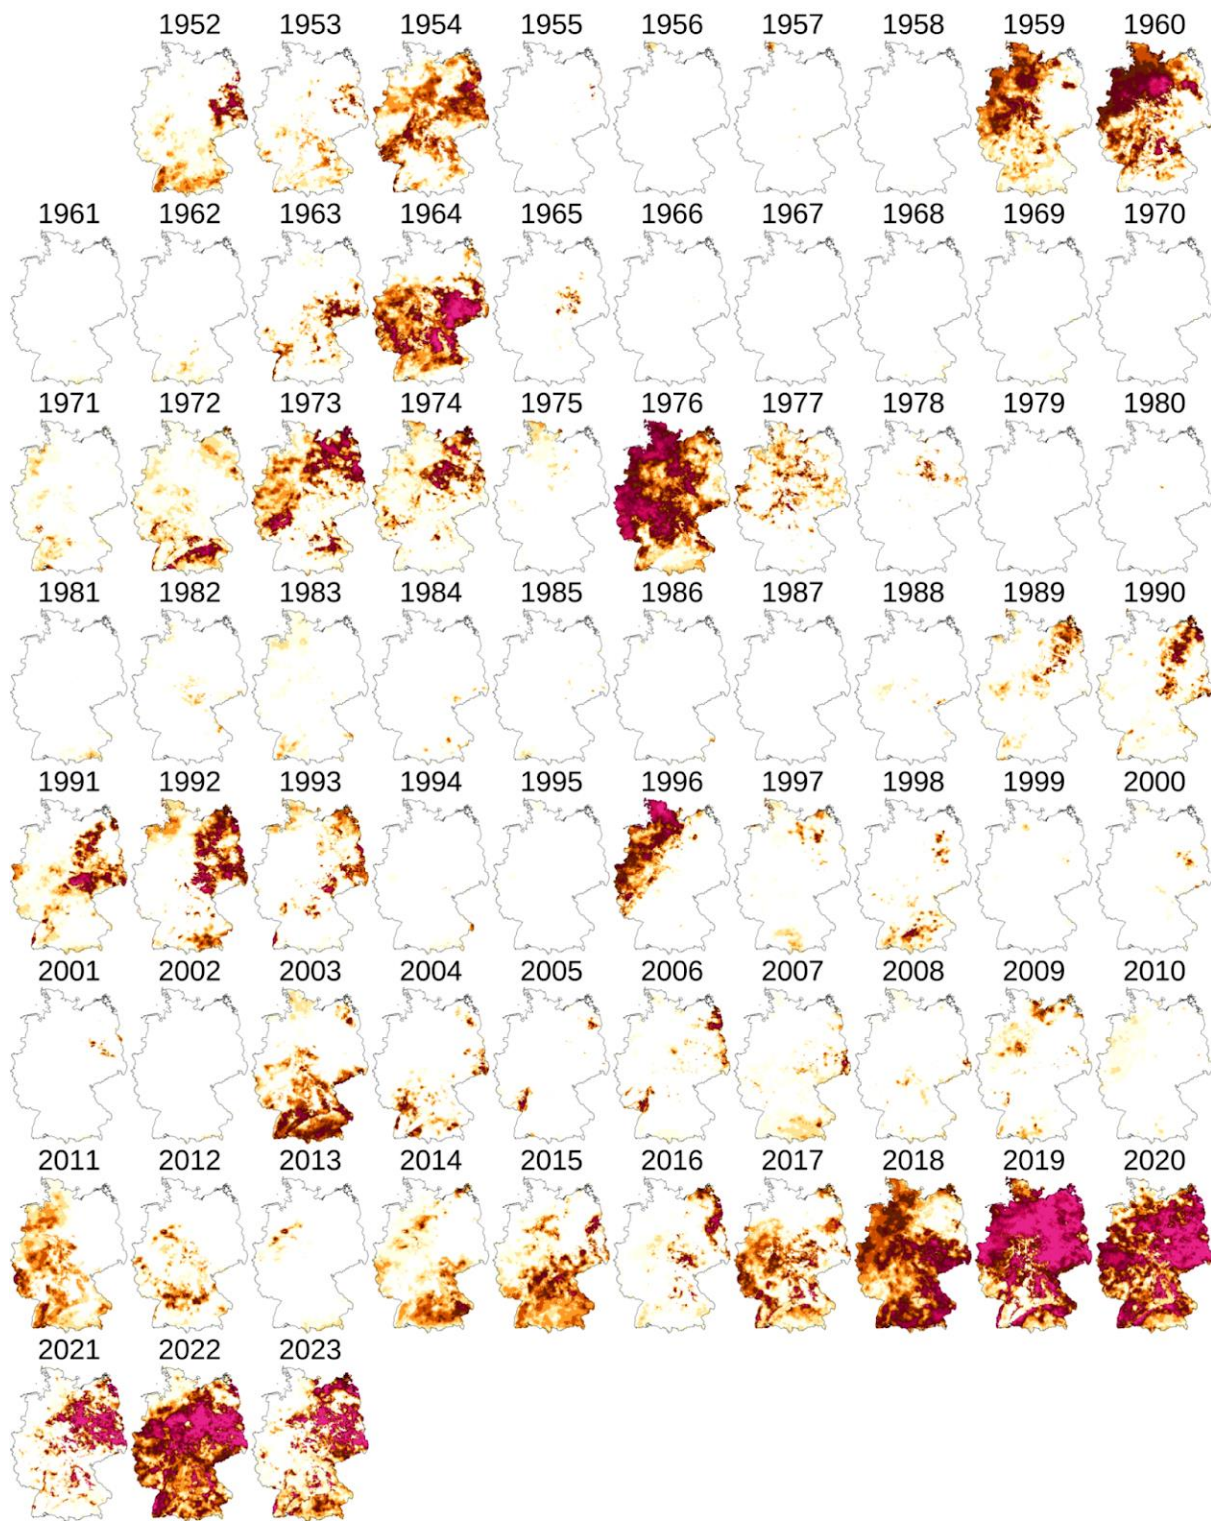

© UFZ-Dürremonitor/ Helmholtz-Zentrum für Umweltforschung, Friedrich Boeing

*Figure 1: Soil moisture (0-2 meters depth) in Germany, Figure from Boeing et al (2022) and Zink et al (2016). The figure will be added in the updated manuscript to contextualize drought events and add a meteorological perspective*
